# Supplementary material
Source: Springer Nature journal article supplement (https://www.springermedizin.de/resource/supplementary/12888_2012_1380_MOESM1_ESM.pdf/9480076)
Supplement: MOESM1 [file 9480076]

Initial RCT

Assessed for eligibility (n = 168)

DSM - IV schizophrenia (n = 96)

Randomized (n=50)

Excluded (n = 46)

- Not recent onset (n=21)
- Substance abuse (n=4)
- Lived outside catchment area (n=4)
- No written consent (n=4)
- Mental retardation (n=2)
- Not recovered from initial psychotic episode (n=11)

IT (n=30)

Received treatment (IT) as allocated (n=27)

Received little or no treatment (n=3)

TAU (n=20)

Received treatment (ST) as allocated (n=16)

Received little or no treatment (n=4)

Migrated (n=2)

Migrated (n=3)

Participants followed up (n=28) (90 % of original cohort)

Participants followed up (n=17) (85 % of original cohort). One patient died four years and nine months into follow-up period.

12 years follow-up
